## DISCUSSION

minimum value of frictional coefficient  $\mu_0$  (dependent only on the strip Poisson's ratio). From [1, 2],  $\mu_0$  is given as

$$\mu_0(\nu) = \frac{(\kappa + 1) \sin \pi\beta}{[(\kappa - 1)(\cos \pi\beta + 1) - 2(\kappa + 1)(\beta - 1) + 4(\beta - 1)^2]} \quad (1)$$

where  $\beta$  is a solution of

$$2\kappa \cos \pi\beta - (\kappa^2 + 1) + 4(\beta - 1)^2 = 0; \quad 0 < \beta < 1 \quad (2)$$

and

$$\kappa = \begin{cases} 3 - 4\nu, & \text{for plane strain, and} \\ (3 - \nu)/(1 + \nu), & \text{for plane stress.} \end{cases}$$

If  $\mu \geq \mu_0(\nu)$ , the exact solution of the problem corresponds to the case of  $c = 1$  and should be identical to the solution presented in [2]. The solution presented by the authors is strictly applicable for the cases in which  $\mu < \mu_0(\nu)$  and one obtains  $c < 1$ . Thus equation (57) in the paper is valid only for  $\mu \leq \mu_0(\nu)$ . Consequently, the correct representation of Fig. 6 must have a bounding curve corresponding to a plot of  $\beta$  versus  $\nu$ , from equation (2) of this Discussion.

## References

- 1 Gupta, G. D., "An Integral Equation Approach to the Semi-Infinite Strip Problem," *JOURNAL OF APPLIED MECHANICS*, Vol. 40, TRANS. ASME, Vol. 95, Series E, 1973, p. 948.
- 2 Gupta, G. D., "The Problem of a Finite Strip Compressed Between Two Rough Rigid Stamps," *JOURNAL OF APPLIED MECHANICS*, Vol. 42, TRANS. ASME, Vol. 97, Series E, 1975, pp. 81-87.

## Authors' Closure

We would like to thank Dr. G. D. Gupta for his interest and the comments on the nature of stress singularity that arises in our investigation of the effect of friction on contact stresses in an elastic rectangle. Some comments are appropriate, however, for certain misunderstandings of our explanation of the results.

The statement quoted from the original paper by Dr. Gupta pertains to the "approximate solution" and *does not* refer to the main results obtained by the solutions of the simultaneous integral equations. This complete solution, indeed, confirms the points raised by Dr. Gupta and have been mentioned several places in the paper. This may also be clearly seen from Figs. 1 and 2 of the paper. The approximate solution is included in the paper for sake of comparison and is based upon the idea of R. D. Mindlin, which neglects the effect of friction on the contact pressure distribution in the slip zone. Mindlin's approximation has proved quite successful in several applications and is easy to apply. This approximation although, is quite good in the present case when considerable slip takes place, but is not so satisfactory when  $c \rightarrow 1$ . The part of discussion quoted by Dr. Gupta offers an explanation of this anomaly and should be read in conjunction with the preceding statement. We are sorry that this was misunderstood.

Regarding the minimum values of the friction coefficient raised in the discussion, we are in complete agreement with Dr. Gupta. We had hoped that this was fairly apparent from a general study of the paper and did not include as a separate discussion for fear that the editorial office would wave the flag on exceeding the length requirements.

## On the Creep Rupture of a Tube and a Sphere<sup>1</sup>

F. K. G. Odqvist,<sup>2</sup> Using theory of Hayhurst and Leckie (*Jour-*

<sup>1</sup> By R. P. Goel and published in the September, 1975, issue of the *JOURNAL OF APPLIED MECHANICS*, Vol. 42, TRANS. ASME, Vol. 97, Series E, pp. 625-629.

<sup>2</sup> Professor, Torstensonsvägen 7D, S-18264, Djursholm, Sweden.

*nal of Mechanics and Physics of Solids*, 1973, Vol. 21, p. 431) author computes lower bounds on creep rupture time in cases of simple geometry and loading, both for "homogeneous" and "nonhomogeneous" damage rate law, material constant  $\alpha$  in general being a fixed number between zero and one. Load is applied at time  $t = 0$  and step-by-step calculations with respect to  $t$  presented in dimensionless form. For a solid rod of circular cross section and a thick-walled tube, both in torsion with a constant torque, three cases were treated ( $\alpha = 0, 0.5, 1.0$ ) and in each case the ratio inner radius over outer radius of tube given the values 0 (solid rod), 0.5 (thick-walled tube), and 0.9 (thin-walled tube). A series of different values of material constants  $n$  (Norton) and  $\nu$  (Kachanov) were used. For example, the case  $n = 4, \nu = 3, \alpha = 0$  for a solid rod, the dimensionless times to rupture were estimated to be 0.288 and 0.412 for a homogeneous and a nonhomogeneous maximum shear damage law, respectively. In this particular case, the ratio  $\rho =$  estimated rupture time for nonhomogeneous damage law over that for homogeneous damage law turns out to be very much the same for the solid rod and the thick-walled tube for all values of  $\alpha$  considered. In fact, from Table 2 may be inferred, for the solid rod:  $\rho = 0.412/0.288 = 1.43$  for  $\alpha = 0$ . Similarly  $\rho = 1.23$  for  $\alpha = 0.5$  and  $\rho = 0.98$  for  $\alpha = 1$ . In the case of the thick-walled tube was obtained, correspondingly:  $\rho = 1.44$  for  $\alpha = 0$ ,  $\rho = 1.24$  for  $\alpha = 0.5$ , and  $\rho = 0.99$  for  $\alpha = 1$ . Note that the figure 0.412 is taken from the table, whereas the text under "Conclusions" presumably shows the erroneous figure 0.142:—thus the author's conclusion "that creep rupture time of a structural element could be significantly effected by the choice of damage law" hardly seems to be justified but, possibly, for the limiting case of the solid rod. Conversely, the dependence of creep rupture time on the material constant  $\alpha$  seems to be quite insignificant. The difference between the time to rupture and time for the first crack to appear is so small that the failure occurs almost instantaneously, and this difference appears to be insensitive to the value of  $\alpha$ , in accordance with author's conclusion. Lower bounds on the rupture time for a hollow sphere creeping under constant internal pressure were also obtained, but in the case  $\alpha = 0$  only.

## Author's Closure

The author would like to thank Professor Odqvist for his valuable comment.

## Parametric and Combination Resonances of a Pipe Conveying Pulsating Fluid<sup>1</sup>

Takuzo Iwatsubo,<sup>2</sup> The authors have reported some very interesting analytical work on the parametric and combination resonances of a pipe conveying pulsating fluid. The presence of combination resonances is open to question.

First, it is concluded in the left side of page 4 and the conclusions that the combination resonances appear to involve only the difference. But our results for the cantilevered beam are not the same as this result because from our results the combination resonances of the sum and the difference type appear as shown in Table I.

From our analytical result, only the combination resonances of the difference type cannot occur.

<sup>1</sup> By M. P. Paidoussis and C. Sundarajan and published in the December, 1975 issue of the *JOURNAL OF APPLIED MECHANICS*, Vol. 42, No. 4, TRANS. ASME, Vol. 97, Series E, pp. 780-784.

<sup>2</sup> The Faculty of Engineering, Kobe University, RokkoNada Kobe, Japan.
